# Supplementary material for: Gut microbiota composition is associated with polypharmacy in elderly hospitalized patients
Source: Springer Nature journal article supplement (doi:10.1038/s41598-017-10734-y), 2017-09-05

## **SUPPLEMENTAL MATERIAL**

### **Gut microbiota composition is associated with polypharmacy in elderly hospitalized patients**

Andrea Ticinesi, Christian Milani, Fulvio Lauretani, Antonio Nouvenne, Leonardo Mancabelli, Gabriele Andrea Lugli, Francesca Turrone, Sabrina Duranti, Marta Mangifesta, Alice Viappiani, Chiara Ferrario, Marcello Maggio, Marco Ventura, Tiziana Meschi

#### **Detail of laboratory procedures and bioinformatic analyses**

Stool samples were processed and analyzed according to an established protocol of next-generation 16S rRNA microbial profiling which was developed and validated by our own research group (Milani C, et al. PlosOne 2013). The details of the laboratory procedures are reported elsewhere (Milani C, et al. Sci Rep 2016). Briefly, partial 16S rRNA gene sequences were amplified from the fecal bacterial DNA using the primer pair Probio Uni and Probio\_Rev, targeting the V3 region of the 16S rRNA gene specific sequences (Milani C, et al. PlosOne 2013). Illumina adapter overhang nucleotide sequences were added to the 16S rRNA gene-specific sequences. The 16S Metagenomic Sequencing Library Preparation protocol was followed to prepare the 16S rRNA gene amplicons through the Polymerase Chain Reaction (PCR) technique. A Verity Thermocycler (Applied Biosystems Inc.) was used for this purpose. The integrity of the PCR amplicons was assessed by electrophoresis using a 2200 TapeStation Instrument (Agilent Technologies, USA). To remove primer dimers, the amplified PCR products were then purified by magnetic purification using the Agencourt AMPure XP DNA beads (Beckman Coulter Genomics GmbH, Bernried, Germany). Fluorimetric Qubit quantification system (Life Technologies) was used to estimate the DNA concentration of the amplified sequence library. Amplicons were diluted to 4 nM. The pooled final library was prepared mixing 5 µL of each diluted DNA amplicon solution. Sequencing was carried out with an Illumina MiSeq sequencer with MiSeq Reagent kit v3 chemicals.

The reads obtained by sequencing were subsequently filtered to remove low-quality and polyclonal sequences. Filtered datasets were exported as .fastq files, which were analyzed using a custom script based on the QIIME software (Caporaso JG, et al. *Nat Methods* 2010). Paired-end read couples (forward and reverse) were merged to reconstruct amplicons. Only sequences with a length between 140 and 400 bp and quality score >20 were considered for analyses, while sequences with homopolymers >7 bp and primers with mismatched sequence were removed. The sequences with an identity  $\geq 97\%$  were pooled in 16S rRNA Operational Taxonomic Units (OTUs) using the software uclust (Edgar RC. *Bioinformatics* 2010). OTUs with less than 10 sequences were removed from the bioinformatics analysis. All the reads were then taxonomically classified using the QIIME software suite (Caporaso JG, et al. *Nat Methods* 2010) and the related 16S database SILVA (Quast C, et al. *Nucleic Acids Res* 2013). Sample biodiversity (alpha-diversity) was calculated using the indexes of species richness Chao1 and Shannon. For each OTU assigned to a known taxon, the relative abundance in the patient microbiome was also determined. Beta diversity analysis of inter-individual variability was made with the Principal Coordinate Analysis (PCoA) method based on unweighted UniFrac method.

## References

Caporaso JG, Kuczynski J, Stombaugh J, et al. QIIME allows analysis of high-throughput community sequencing data. *Nat Methods*. 2010;7(5):335-336.

Edgar RC. Search and clustering orders of magnitude faster than BLAST. *Bioinformatics*. 2010;26(19):2460-2461.

Milani C, Hevia A, Foroni E, et al. Assessing the fecal microbiota: an optimized ion torrent 16S rRNA gene-based analysis protocol. *PLoS One*. 2013;8(7):e68739.

Milani C, Ticinesi A, Gerritsen J, et al. Gut microbiota composition and *Clostridium difficile* infection in hospitalized elderly individuals: a metagenomic study. *Sci Rep*. 2016;6:25945.

Quast C, Pruesse E, Yilmaz P, et al. The SILVA ribosomal RNA gene database project: improved data processing and web-based tools. *Nucleic Acids Res*. 2013;41:D590-D596.





|                               |            |         |       |   |   |   |           |          |      |   |
|-------------------------------|------------|---------|-------|---|---|---|-----------|----------|------|---|
| <i>Finegoldia</i>             | -          | -       | -     | - | - | - | -         | -        | -    | - |
| <i>Flavobacterium</i>         | -          | -       | -     | - | - | - | -         | -        | -    | - |
| <i>Flavonifractor</i>         | -          | -       | -     | - | - | - | -         | -        | -    | - |
| <i>Fonticella</i>             | 0.0009 ±   | 0.00004 | 0.04  | - | - | - | -         | -        | -    | - |
| <i>Fusobacterium</i>          | -          | -       | -     | - | - | - | -         | -        | -    | - |
| <i>Gelria</i>                 | -          | -       | -     | - | - | - | -         | -        | -    | - |
| <i>Gemella</i>                | -          | -       | -     | - | - | - | -         | -        | -    | - |
| <i>Gordonibacter</i>          | -          | -       | -     | - | - | - | -         | -        | -    | - |
| <i>Haemophilus</i>            | -          | -       | -     | - | - | - | 0.00004 ± | 0.00002  | 0.03 |   |
| <i>Hafnia</i>                 | -          | -       | -     | - | - | - | 0.00006 ± | 0.000003 | 0.01 |   |
| <i>Halaerobium</i>            | -          | -       | -     | - | - | - | -         | -        | -    | - |
| <i>Helicobacter</i>           | 0.0006 ±   | 0.00002 | 0.009 | - | - | - | -         | -        | -    | - |
| <i>Holdemania</i>             | -          | -       | -     | - | - | - | -         | -        | -    | - |
| <i>Howardella</i>             | -          | -       | -     | - | - | - | -         | -        | -    | - |
| <i>Hydrogenophaga</i>         | -0.00008 ± | 0.00004 | 0.05  | - | - | - | -         | -        | -    | - |
| <i>Hydrogenoaerobacterium</i> | -          | -       | -     | - | - | - | -         | -        | -    | - |
| <i>Hyphomicrobium</i>         | -          | -       | -     | - | - | - | -         | -        | -    | - |
| <i>Intestinimonas</i>         | -          | -       | -     | - | - | - | -         | -        | -    | - |
| <i>Athinobacterium</i>        | -          | -       | -     | - | - | - | -         | -        | -    | - |
| <i>Klebsiella</i>             | -          | -       | -     | - | - | - | -         | -        | -    | - |
| <i>Lachnospira</i>            | -          | -       | -     | - | - | - | -         | -        | -    | - |
| <i>Lactobacillus</i>          | -          | -       | -     | - | - | - | -         | -        | -    | - |
| <i>Lactococcus</i>            | -          | -       | -     | - | - | - | -         | -        | -    | - |
| <i>Leptothrix</i>             | -          | -       | -     | - | - | - | -         | -        | -    | - |
| <i>Marinilactibacillus</i>    | -          | -       | -     | - | - | - | -         | -        | -    | - |
| <i>Marvinbryantia</i>         | -          | -       | -     | - | - | - | -         | -        | -    | - |
| <i>Massilia</i>               | -          | -       | -     | - | - | - | -         | -        | -    | - |
| <i>Megamonas</i>              | -          | -       | -     | - | - | - | -         | -        | -    | - |
| <i>Megasphaera</i>            | -          | -       | -     | - | - | - | -         | -        | -    | - |
| <i>Methobrevibacter</i>       | -          | -       | -     | - | - | - | -         | -        | -    | - |
| <i>Mitsuokella</i>            | -          | -       | -     | - | - | - | -         | -        | -    | - |
| <i>Mogibacterium</i>          | -          | -       | -     | - | - | - | -         | -        | -    | - |
| <i>Morganella</i>             | 0.00004 ±  | 0.00001 | 0.003 | - | - | - | -         | -        | -    | - |









|                                    |   |   |   |   |   |   |   |   |   |
|------------------------------------|---|---|---|---|---|---|---|---|---|
| U. m. of Gammaproteobacteria class | - | - | - | - | - | - | - | - | - |
| U. m. of Proteobacteria phylum     | - | - | - | - | - | - | - | - | - |
| U. m. of NB1-n order               | - | - | - | - | - | - | - | - | - |
| U. m. of RF9 order                 | - | - | - | - | - | - | - | - | - |
| U. m. of vadinHA64 order           | - | - | - | - | - | - | - | - | - |
| U. m. of Bacteria kingdom          | - | - | - | - | - | - | - | - | - |
| U. m. of Acidimicrobiales order    | - | - | - | - | - | - | - | - | - |
| U. m. of Bifidobacteriaceae family | - | - | - | - | - | - | - | - | - |
| U. m. of Corynebacteriaceae family | - | - | - | - | - | - | - | - | - |
| U. m. of Actinobacteria class      | - | - | - | - | - | - | - | - | - |
| U. m. of Coriobacteriaceae family  | - | - | - | - | - | - | - | - | - |
| U. m. of Actinobacteria phylum     | - | - | - | - | - | - | - | - | - |
| U. m. of Porphyromonadaceae family | - | - | - | - | - | - | - | - | - |
| U. of Prevotellaceae family        | - | - | - | - | - | - | - | - | - |
| U. m. of rat_AT060301C family      | - | - | - | - | - | - | - | - | - |
| U. m. of Halobacteriaceae family   | - | - | - | - | - | - | - | - | - |
| <i>Vagococcus</i>                  | - | - | - | - | - | - | - | - | - |
| <i>Variovorax</i>                  | - | - | - | - | - | - | - | - | - |
| <i>Veillonella</i>                 | - | - | - | - | - | - | - | - | - |
| <i>Victivallis</i>                 | - | - | - | - | - | - | - | - | - |

U. m. = Unclassified member; SE = Standard Error; CIRS = Cumulative Illness Rating Scale.

p\*= Multivariate linear regression models adjusted for age, sex, Rockwood Clinical Frailty Scale, CIRS Comorbidity Score.

p\*\*= Multivariate linear regression models adjusted for age, sex, number of drugs, CIRS Comorbidity Score.

p\*\*\*= Multivariate linear regression models adjusted for age, sex, number of drugs, Rockwood Clinical Frailty Scale.

## Supplemental figure 1.

**Taxonomic analysis of gut microbiota.** Overall composition of gut microbiota at genus level, sample by sample, detected by 16S rRNA microbial profiling.

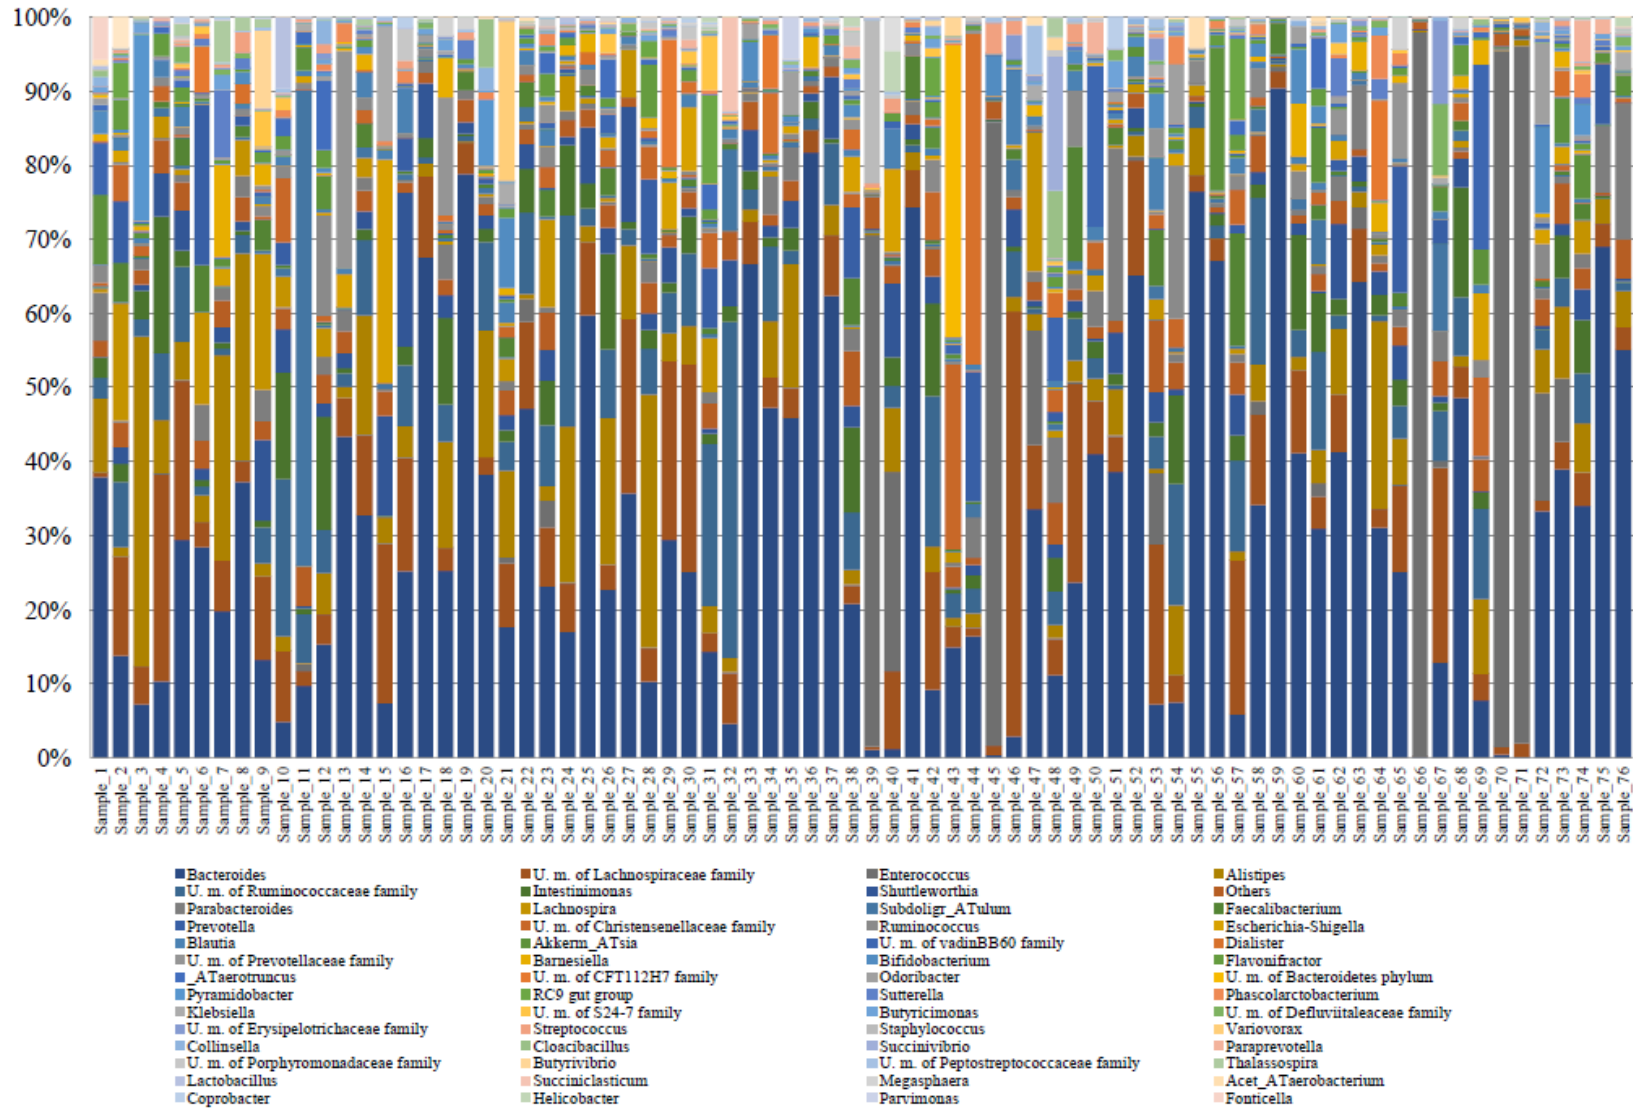

## Supplemental figure 2.

**Effect of single drug class exposure on the overall composition of fecal microbiota.** Principal Coordinate Analyses based on unweighted UniFrac showing inter-individual variability of fecal microbiota composition according to the chronic exposure to single drug classes.

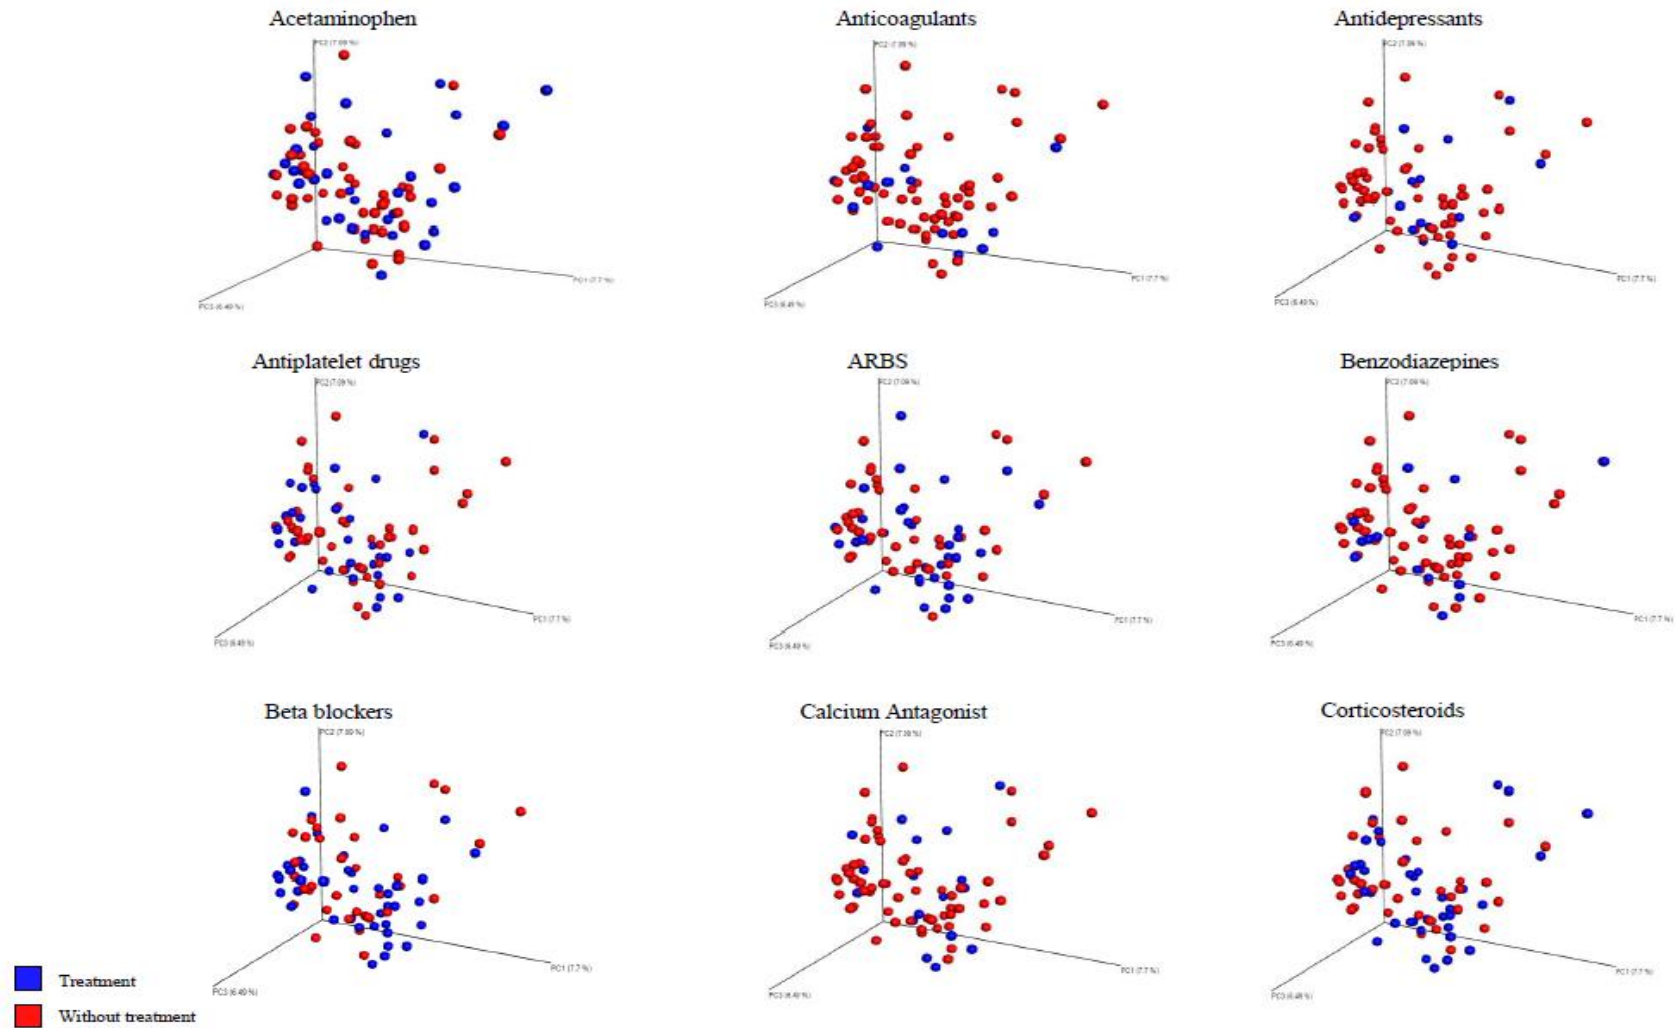

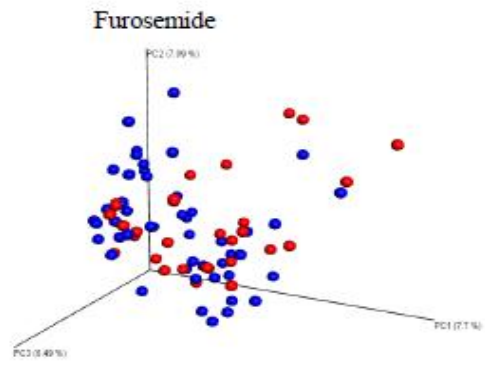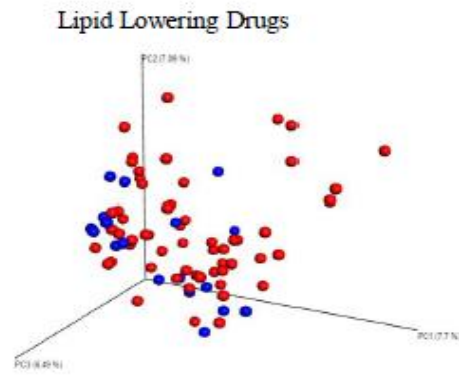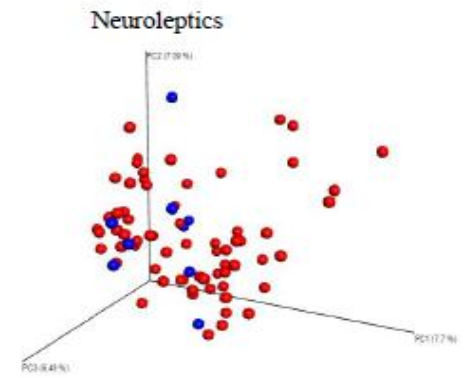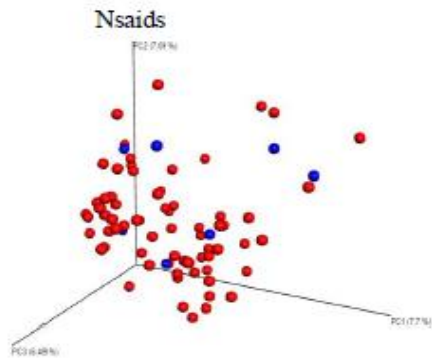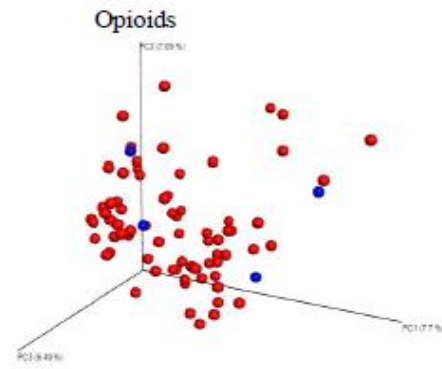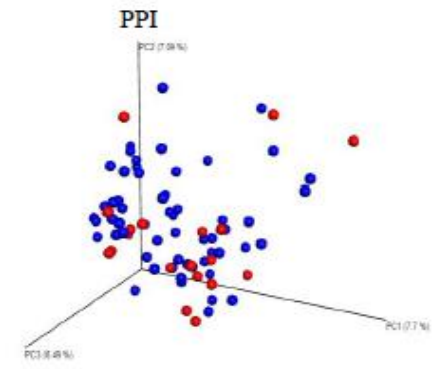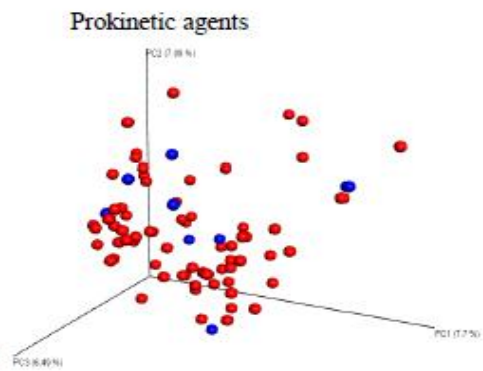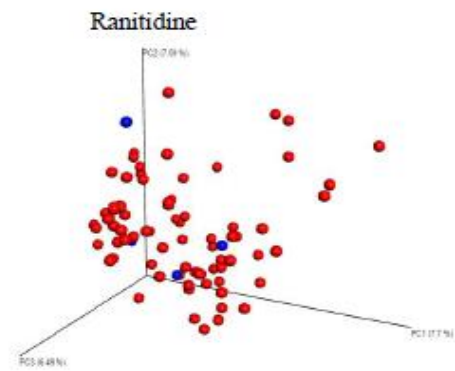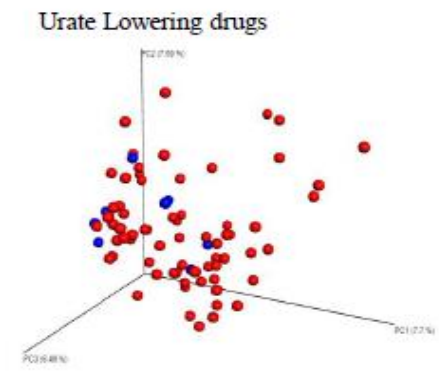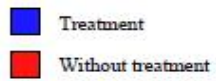

Supplement: 41598_2017_10734_MOESM1_ESM.pdf [file 41598_2017_10734_MOESM1_ESM.pdf]
